# Supplementary material
Source: PubMed Central journal article supplement (PMC5969999)
Supplement: NIHMS944244-supplement-S5.pdf [file NIHMS944244-supplement-S5.pdf]

**Table S5 - SG RBPs by stress and cell type, related to Figure 4**

| <b>stress-type specificity</b> |                         |                   |
|--------------------------------|-------------------------|-------------------|
| <b>HeLa AS specific</b>        | <b>HeLa HS specific</b> | <b>HeLa AS-HS</b> |
| ABCF1                          | DDX6                    | AQR               |
| ADD1                           | EIF2C1                  | ATXN2             |
| DAZAP1                         | SF1                     | BCCIP             |
| EIF3A                          |                         | CASC3             |
| EIF4G3                         |                         | CIRBP             |
| FUS                            |                         | DDX3X             |
| NOLC1                          |                         | DDX3Y             |
| SLBP                           |                         | DROSHA            |
| XRN2                           |                         | EIF3D             |
|                                |                         | EIF3G             |
|                                |                         | EIF3H             |
|                                |                         | EIF4B             |
|                                |                         | EIF4G1            |
|                                |                         | EIF4H             |
|                                |                         | FAM120A           |
|                                |                         | FMR1              |
|                                |                         | FUBP3             |
|                                |                         | FXR1              |
|                                |                         | FXR2              |
|                                |                         | G3BP1             |
|                                |                         | G3BP2             |
|                                |                         | IGF2BP1           |
|                                |                         | IGF2BP3           |
|                                |                         | METAP2            |
|                                |                         | MSI2              |
|                                |                         | NKRF              |
|                                |                         | NUFIP2            |
|                                |                         | PABPC4            |
|                                |                         | PCBP2             |
|                                |                         | PRRC2C            |
|                                |                         | PSPC1             |
|                                |                         | PUM1              |
|                                |                         | PUM2              |
|                                |                         | RBM25             |
|                                |                         | SAFB2             |
|                                |                         | SND1              |
|                                |                         | SRSF5             |
|                                |                         | TIAL1             |
|                                |                         | UBAP2L            |
|                                |                         | ZONAB             |

cell-type specificity

| HepG2 specific                   | HeLa specific  | NPC specific                                                                                                                                                       | HepG2-HeLa | HepG2-NPC                                             | HeLa-NPC                       | HepG2-HeLa-NPC                                                                                                                                                                                                                                                                                                                                                                           |
|----------------------------------|----------------|--------------------------------------------------------------------------------------------------------------------------------------------------------------------|------------|-------------------------------------------------------|--------------------------------|------------------------------------------------------------------------------------------------------------------------------------------------------------------------------------------------------------------------------------------------------------------------------------------------------------------------------------------------------------------------------------------|
| RECQL<br>RPS11<br>SRSF7<br>SRSF9 | EIF3A<br>NOLC1 | CCDC124<br>DHX30<br>DHX33<br>AGO1<br>EIF4A2<br>EIF4A3<br>HSPD1<br>IGF2BP2<br>MSI1<br>NELFE<br>PARN<br>PNPT1<br>RBM15<br>RPS24<br>SRP68<br>TRIP6<br>TROVE2<br>UTP18 | SLBP       | CELF1<br>DDX1<br>LIN28B<br>PPP1R8<br>RBM17<br>ZC3H11A | ABCF1<br>ADD1<br>SAFB2<br>XRN2 | AQR<br>ATXN2<br>BCCIP<br>CASC3<br>CIRBP<br>DAZAP1<br>DDX3X<br>DDX3Y<br>DROSHA<br>EIF3D<br>EIF3G<br>EIF3H<br>EIF4B<br>EIF4G1<br>EIF4G3<br>EIF4H<br>FAM120A<br>FMR1<br>FUBP3<br>FUS<br>FXR1<br>FXR2<br>G3BP1<br>G3BP2<br>IGF2BP1<br>IGF2BP3<br>METAP2<br>MSI2<br>NKRF<br>NUFIP2<br>PABPC4<br>PCBP2<br>PRRC2C<br>PSPC1<br>PUM1<br>PUM2<br>RBM25<br>SND1<br>SRSF5<br>TIAL1<br>UBAP2L<br>YBX3 |
