# Supplementary material
Source: PubMed Central journal article supplement (PMC5969999)
Supplement: NIHMS944244-supplement-S8.pdf [file NIHMS944244-supplement-S8.pdf]

**Table S8 - Oligonucleotides, related to Key Resource Table**

| Oligo name              | Sequence                                                              | Use and additional information                                         |
|-------------------------|-----------------------------------------------------------------------|------------------------------------------------------------------------|
| G3BP1_gRNA4_F           | caccTCATGCAGCCATACAAACCC                                              | Cloning of G3BP1 gRNAs into px458 Cas9 expression plasmid              |
| G3BP1_gRNA4_R           | aaacGGGTTTGTATGGCTGCATGA                                              |                                                                        |
| G3BP1_gRNA5_F           | caccTCCATGAAGATTCACTGCCG                                              |                                                                        |
| G3BP1_gRNA5_R           | aaacCGGCAGTGAATCTTCATGGA                                              |                                                                        |
| G3BP_5AoH_v15_NdeI_F    | TCAGAGCAGATTGTA CTGAGAGTGCAC <b>CATATG</b> TCCCCGGCCCTTAGTTTGCTAGTCCT | Amplification of homology arms for donor G3BP1-APEX2-GFP donor plasmid |
| V5_loxP_1-15_R          | TGCTATACGAAGTTATcgtagaatcgagaccgaggagagggtagggataggcttaccGA           |                                                                        |
| G3BP_3AoH_SP_Sall_F     | cggcatggacgagctgtacaagtaa <b>GTCGAC</b> ATCTTCATGGATCTTCATGCAGCCATACA |                                                                        |
| G3BP_3AoH_v12_HR_SphI_R | AGCTATGACCATGATTACGCCAAGCTT <b>GCAATG</b> CCATCAATAAAAGAGAACCATAAC    |                                                                        |
| G3BP_intmap_F1          | AGCCACTGAAGAACCCAGAA                                                  | Integration mapping of APEX2-GFP into <i>G3BP1</i> locus               |
| attB1_UBAP2L_F          | GGGGACAAGTTTGTACAAAAAAGCAGGCTTCACCATGATGACATCGGTGGGCACTAACCG          | Cloning of full-length UBAP2L into pDONR221 gateway plasmid            |
| attB2_UBAP2L_R          | GGGGACCACTTTGTACAAGAAAGCTGGGTTTTActtgtagagctgctcatgccc                |                                                                        |
| UBAP2L_deltaUBA_F       | AAGGATGGTGGCCAGAC                                                     | Deletion of UBA domain in UBAP2L by PCR                                |
| UBAP2L_deltaUBA_R       | GTTTTGAGGTTGTTCCAG                                                    |                                                                        |
| UBAP2L_intseq_F1        | TCTGCTCAAGGAATGGGAAC                                                  | Sequence verification of cloned UBAP2L constructs                      |
| UBAP2L_intseq_F2        | ACAGATGTCGCCTGGATCTT                                                  |                                                                        |
| UBAP2L_intseq_F3        | TCCATTCTTCCTCCAGCACT                                                  |                                                                        |
| UBAP2L_intseq_F4        | TCCTTCAACTTGCCTTCAGC                                                  |                                                                        |
| pLKO.1-shRNA-control    | AACAAGATGAAGAGCACCAACTCGAGTTGGTCTCTTCATCTTGT                          | non-targeting, scrambled siRNA                                         |
| UBAP2L-Sh3              | CCGGGCCAATACTGATGATACTATCTCGAGATAGTTATCATCAGTATTGGCTTTTT              | siRNA against UBAP2L, TRCN0000007680, targets NM_014847.2-671s1c1      |
| UBAP2L-Sh4              | CCGGGCGCAGCAGAATACCCTTTCATCTCGAGATGAAAGGGTATTCTGCTGCGTTTTT            | siRNA against UBAP2L, TRCN0000007681, targets NM_014847.2-2145s1c1     |
